# Supplementary material for: Energetic nitrogen-rich salts and ionic liquids: 5-aminotetrazole (AT) as a weak acid
Source: Royal Society of Chemistry journal article supplement (doi:10.1039/b811506k), 2008-01-01

## Supporting Information

Belonging to the manuscript

# **Energetic Nitrogen Rich-Salts and Ionic Liquids:**

## **5-Aminotetrazolate (AT) as a Weak Acid**

Guo-Hong Tao, Yong Guo, Young-Hyuk Joo, Brendan Twamley, and Jean'ne M. Shreeve\*

Department of Chemistry, University of Idaho, Moscow, Idaho, 83844-2343, USA  
[jshreeve@uidaho.edu](mailto:jshreeve@uidaho.edu)

### **Table of contents**

**Table S-1** *Ab initio* computational data.

**S-11** References

**Table S-2** Bond lengths and bond angles in crystal **5**.

**Table S-3** Hydrogen bonding geometry in crystal **5**.

**Figure S-1** DSC plots of AT salts, **2**, **3**, **4**, **5**, and **9**, heating rate 10 °C/min.

**Figure S-2** DSC plots of AT ionic liquids, **7**, and **8**, heating rate 10 °C/min.

**Table S1** Calculated (B3LYP/6-31+G\*\*//MP2/6-311++G\*\*) Total Energy ( $E_0$ ), Zero-Point Energy (ZPE), Values of Thermal Correction ( $H_T$ ), and Heats of Formation (HOF) of the ions.

| Name                                        | $E_0$<br>(au) | ZPE<br>(au) | $H_T$<br>(kJ/mol) | HOF<br>(kJ/mol)      |
|---------------------------------------------|---------------|-------------|-------------------|----------------------|
| Guanidinium cation                          | -205.2570379  | 0.088421    | 16.4              | 566.7                |
| Aminoguanidinium cation                     | -260.4513108  | 0.105672    | 19.5              | 646.7                |
| Guanylguanidinium cation                    | -353.7240685  | 0.127659    | 23.3              | 620.9                |
| 4-Amino-1 <i>H</i> -1,2,4-triazolium cation | -297.2005028  | 0.089612    | 15.5              | 910.7                |
| 4-Amino-1-methyl-1,2,4-triazolium cation    | -336.4026071  | 0.116980    | 18.1              | 866.6                |
| 4-Amino-1-ethyl-1,2,4-triazolium cation     | -375.6060696  | 0.145786    | 23.2              | 828.2                |
| 1,5-Diamino-4-methyltetrazolium cation      | -407.63759    | 0.121200    | 23.7              | 974.3                |
| 5-Amino-tetrazolate anion                   | -312.3505776  | 0.050441    | 13.1              | 183.8                |
| 1,2,4-Triazolium cation                     | -242.00879    | 0.07324     | 12.0              | 835.0 <sup>[1]</sup> |
| 1,2,3,4-Tetrazolium cation                  | -257.98206    | 0.06029     | 11.8              | 1016.5               |
| 1,2,3,4-Tetrazolate anion                   | -257.12424    | 0.03382     | 11.1              | 170.0                |
| Guanidine                                   | -204.8735031  | 0.075945    | 14.4              | 26.0 <sup>[2]</sup>  |
| CH <sub>4</sub>                             | -40.3796224   | 0.044793    | 10.0              | -74.6 <sup>[3]</sup> |
| CH <sub>3</sub> NH <sub>2</sub>             | -95.59384     | 0.06403     | 11.5              | -23.0 <sup>[3]</sup> |
| NH <sub>2</sub> NH <sub>2</sub>             | -111.5836915  | 0.05331     | 11.0              | 95.4 <sup>[3]</sup>  |
| NH <sub>3</sub>                             | -56.4154647   | 0.034384    | 10.0              | -45.9 <sup>[3]</sup> |
| CH <sub>3</sub> CH <sub>3</sub>             | -79.571631    | 0.07461     | 11.6              | -84.0 <sup>[3]</sup> |

### Geometry Coordinates

B3LYP/6-31+G(d,p) optimized geometries (Å)

Guanidinium cation

|   |           |           |           |
|---|-----------|-----------|-----------|
| N | -1.321565 | -0.205759 | -0.001103 |
| H | -1.712671 | -1.117729 | -0.190869 |
| H | -1.970964 | 0.542506  | 0.196530  |
| N | 0.482509  | 1.247196  | -0.000648 |
| H | -0.111583 | 2.041503  | -0.192387 |
| H | 1.455076  | 1.435319  | 0.197728  |
| C | -0.000067 | -0.000207 | 0.000163  |
| N | 0.839274  | -1.041242 | 0.000175  |
| H | 0.515935  | -1.978052 | 0.195878  |
| H | 1.823085  | -0.923670 | -0.196822 |

Aminoguanidinium cation

|   |           |           |           |
|---|-----------|-----------|-----------|
| C | -0.504976 | 0.010490  | -0.000029 |
| N | -1.672119 | -0.645757 | 0.000086  |
| H | -2.552499 | -0.151829 | 0.001064  |
| H | -1.714448 | -1.654549 | -0.000865 |
| N | -0.450326 | 1.338155  | -0.000108 |
| H | -1.278826 | 1.913876  | 0.000001  |
| H | 0.468074  | 1.768621  | -0.000311 |
| N | 0.648420  | -0.687107 | -0.000330 |
| H | 0.630718  | -1.701363 | 0.001063  |
| N | 1.857403  | 0.016619  | 0.000051  |
| H | 2.395955  | -0.194844 | 0.836789  |

H 2.397236 -0.196219 -0.835458

Guanylguanidinium cation

N -2.314538 -0.864119 0.020001  
N -1.290750 1.299628 -0.065131  
N -0.013984 -0.648573 -0.062699  
N 2.291511 -0.864577 -0.007758  
N 1.323720 1.252320 0.056428  
C -1.271523 0.022110 -0.012483  
C 1.216003 -0.060793 0.000652  
H -3.248678 -0.478054 0.035410  
H -2.216260 -1.743927 0.509578  
H -2.215512 1.709109 0.039310  
H -0.038768 -1.614416 -0.363807  
H 3.224367 -0.481085 -0.061090  
H 2.213614 -1.862354 0.124293  
H 0.429349 1.775573 -0.013737  
H 2.213295 1.704487 0.215129

4-Amino-1*H*-1,2,4-triazolium cation

C -0.172838 -1.076494 0.000083  
N 0.646548 -0.011281 0.000012  
H 0.138613 -2.111769 0.000087  
N -1.420322 0.777774 0.000105  
C -0.158532 1.114920 -0.000022  
H 0.217205 2.128611 -0.000051  
N 2.040327 -0.142025 -0.000050  
H 2.429365 0.280973 -0.840035  
H 2.429399 0.280570 0.840123  
N -1.401764 -0.583657 -0.000104  
H -2.279887 -1.094613 -0.000224

4-Amino-1-methyl-1,2,4-triazolium cation

C 0.006248 -0.892372 0.000023  
N 1.094927 -0.099125 0.000000  
H 0.023968 -1.972845 0.000022  
N -0.672815 1.221604 -0.000062  
C 0.633882 1.200485 0.000071  
H 1.273413 2.071788 0.000093  
N 2.397847 -0.610898 -0.000041  
H 2.889464 -0.311583 -0.839054  
H 2.889422 -0.311798 0.839074  
N -1.048666 -0.091165 0.000002  
C -2.477522 -0.450248 0.000000  
H -2.708511 -1.025521 -0.897763  
H -2.708536 -1.025431 0.897815  
H -3.033921 0.485286 -0.000055

4-Amino-1-ethyl-1,2,4-triazolium cation

C -0.453418 -0.887568 -0.137908

|   |           |           |           |
|---|-----------|-----------|-----------|
| N | -1.533490 | -0.103428 | 0.053323  |
| H | -0.465042 | -1.967675 | -0.154799 |
| N | 0.204983  | 1.230107  | -0.213824 |
| C | -1.083823 | 1.199207  | -0.001677 |
| H | -1.720357 | 2.065219  | 0.113005  |
| N | -2.816937 | -0.624592 | 0.253783  |
| H | -3.169571 | -0.342863 | 1.165488  |
| H | -3.438629 | -0.317566 | -0.490684 |
| N | 0.581950  | -0.079408 | -0.297782 |
| C | 2.006363  | -0.427326 | -0.524049 |
| H | 2.025570  | -1.498340 | -0.738854 |
| H | 2.307146  | 0.113529  | -1.424300 |
| C | 2.877284  | -0.063878 | 0.674751  |
| H | 2.578027  | -0.615324 | 1.570632  |
| H | 3.913068  | -0.326452 | 0.443355  |
| H | 2.835814  | 1.008113  | 0.880951  |

1,5-Diamino-4-methyl-tetrazolium cation

|   |           |           |           |
|---|-----------|-----------|-----------|
| C | 0.015400  | 0.608371  | -0.000002 |
| N | 1.070948  | -0.235973 | -0.000003 |
| N | 0.625821  | -1.539709 | 0.000001  |
| N | -0.637344 | -1.512320 | 0.000018  |
| N | -1.057975 | -0.198681 | -0.000015 |
| N | 0.084884  | 1.933576  | 0.000021  |
| H | 1.000085  | 2.369554  | 0.000013  |
| H | -0.739521 | 2.516578  | -0.000035 |
| N | 2.388355  | 0.176842  | -0.000005 |
| H | 2.860771  | -0.162415 | 0.836451  |
| H | 2.860759  | -0.162380 | -0.836482 |
| C | -2.483670 | 0.137308  | -0.000003 |
| H | -2.734056 | 0.702498  | 0.900845  |
| H | -2.733930 | 0.703009  | -0.900565 |
| H | -3.027312 | -0.807060 | -0.000310 |

5-Aminotetrazolate anion

|   |           |           |           |
|---|-----------|-----------|-----------|
| C | -0.581765 | -0.048938 | 0.000109  |
| N | 0.210406  | -1.127001 | -0.000844 |
| N | 0.113966  | 1.099541  | -0.000134 |
| N | 1.403651  | 0.706163  | -0.000219 |
| N | 1.460917  | -0.618158 | 0.000817  |
| N | -2.012399 | -0.124491 | 0.000111  |
| H | -2.372595 | 0.369803  | 0.813530  |
| H | -2.372601 | 0.371446  | -0.812300 |

**S-11 References**

[1] M. W. Schmidt, M. S. Gordon and J. A. Boatz, *J. Phys. Chem., A*, 2005, **109**, 7285–7295.

[2] Y. Guo, H. Gao, B. Twamley, and J. M. Shreeve, *Adv. Mater.*, 2007, **19**, 2884–2888.

[3] D. R. Lide, ed., "Standard Thermodynamic Properties of Chemical Substances" in *CRC Handbook of Chemistry and Physics, Internet Version 2007, (87th Edition)*, <<http://www.hbcnetbase.com>>, Taylor and Francis, Boca Raton, FL, 2007.

**Table S2** Bond lengths [Å] and bond angles [°] in crystal **5**.

|                |            |                   |            |
|----------------|------------|-------------------|------------|
| C(3)-N(2)      | 1.3320(18) | N(6)-C(5)-N(7)    | 118.10(13) |
| C(3)-N(4)      | 1.3399(17) | N(6)-C(5)-N(4)    | 124.45(13) |
| C(3)-N(1)      | 1.3459(18) | N(7)-C(5)-N(4)    | 117.32(13) |
| C(5)-N(6)      | 1.3360(18) | N(13)-C(9)-N(10)  | 112.59(12) |
| C(5)-N(7)      | 1.3373(18) | N(13)-C(9)-N(8)   | 124.66(12) |
| C(5)-N(4)      | 1.3432(18) | N(10)-C(9)-N(8)   | 122.67(13) |
| C(9)-N(13)     | 1.3374(18) | C(3)-N(1)-H(1A)   | 119.7(13)  |
| C(9)-N(10)     | 1.3403(17) | C(3)-N(1)-H(1B)   | 117.8(15)  |
| C(9)-N(8)      | 1.3865(17) | H(1A)-N(1)-H(1B)  | 118.9(19)  |
| N(1)-H(1A)     | 0.87(2)    | C(3)-N(2)-H(2A)   | 117.9(12)  |
| N(1)-H(1B)     | 0.83(2)    | C(3)-N(2)-H(2B)   | 119.6(13)  |
| N(2)-H(2A)     | 0.90(2)    | H(2A)-N(2)-H(2B)  | 120.3(18)  |
| N(2)-H(2B)     | 0.87(2)    | C(3)-N(4)-C(5)    | 121.66(12) |
| N(6)-H(6A)     | 0.87(2)    | C(5)-N(6)-H(6A)   | 119.9(14)  |
| N(6)-H(6B)     | 0.88(2)    | C(5)-N(6)-H(6B)   | 118.2(14)  |
| N(7)-H(7A)     | 0.91(2)    | H(6A)-N(6)-H(6B)  | 122(2)     |
| N(7)-H(7B)     | 0.86(2)    | C(5)-N(7)-H(7A)   | 116.7(13)  |
| N(8)-H(8A)     | 0.90(2)    | C(5)-N(7)-H(7B)   | 120.7(15)  |
| N(8)-H(8B)     | 0.84(2)    | H(7A)-N(7)-H(7B)  | 122.3(17)  |
| N(10)-N(11)    | 1.3523(16) | C(9)-N(8)-H(8A)   | 110.3(14)  |
| N(11)-N(12)    | 1.3107(17) | C(9)-N(8)-H(8B)   | 111.3(14)  |
| N(12)-N(13)    | 1.3605(17) | H(8A)-N(8)-H(8B)  | 114(2)     |
|                |            | C(9)-N(10)-N(11)  | 104.15(11) |
| N(2)-C(3)-N(4) | 118.31(13) | N(12)-N(11)-N(10) | 109.68(11) |
| N(2)-C(3)-N(1) | 118.18(12) | N(11)-N(12)-N(13) | 109.83(11) |
| N(4)-C(3)-N(1) | 123.46(13) | C(9)-N(13)-N(12)  | 103.75(11) |

**Table S3** Hydrogen bonding geometry in crystal **5** [Å and °].

| D-H...A              | d(D-H)  | d(H...A) | d(D...A)   | <(DHA)    |
|----------------------|---------|----------|------------|-----------|
| N(1)-H(1A)...N(13)#1 | 0.87(2) | 2.12(2)  | 2.9687(17) | 165(2)    |
| N(1)-H(1B)...N(12)#2 | 0.83(2) | 2.49(2)  | 3.1442(18) | 136.7(18) |
| N(2)-H(2A)...N(12)#2 | 0.90(2) | 2.23(2)  | 3.0313(17) | 148.4(16) |
| N(2)-H(2B)...N(11)#3 | 0.87(2) | 2.08(2)  | 2.9513(17) | 171.5(17) |
| N(6)-H(6A)...N(12)#4 | 0.87(2) | 2.29(2)  | 3.1498(17) | 170.3(18) |
| N(6)-H(6B)...N(8)#5  | 0.88(2) | 2.24(2)  | 3.0858(18) | 162.0(19) |
| N(7)-H(7A)...N(10)#6 | 0.91(2) | 2.06(2)  | 2.9590(18) | 169.0(18) |
| N(7)-H(7B)...N(8)#5  | 0.86(2) | 2.58(2)  | 3.3181(19) | 144.4(18) |
| N(8)-H(8A)...N(10)#7 | 0.90(2) | 2.43(2)  | 3.0726(17) | 128.9(18) |
| N(8)-H(8B)...N(4)#8  | 0.84(2) | 2.25(2)  | 3.0860(17) | 169.8(19) |

Symmetry transformations used to generate equivalent atoms:

#1 -x+1,y-1/2,-z+1/2    #2 -x+3/2,-y+1,z+1/2    #3 -x+1,y+1/2,-z+1/2  
 #4 -x+1/2,-y+1,z+1/2    #5 -x,y-1/2,-z+1/2    #6 x+1,y,z  
 #7 -x,y+1/2,-z+1/2    #8 x-1,y,z

**Figure S1** DSC plots of AT salts, **2**, **3**, **4**, **5**, **6**, and **9**, heating rate 10 °C/min.

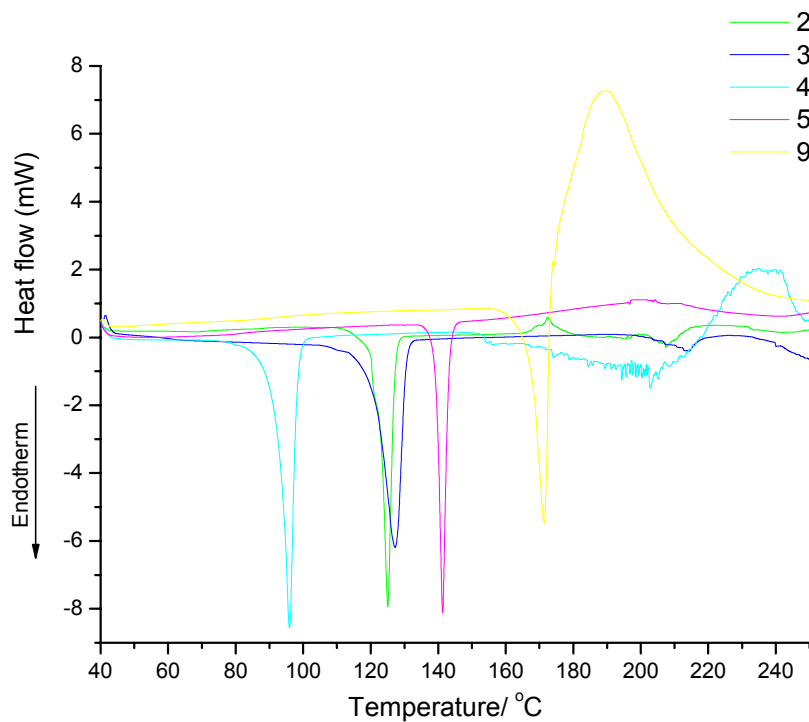

**Figure S2** DSC plots of AT ionic liquids, **7**, and **8**, heating rate 10 °C/min.

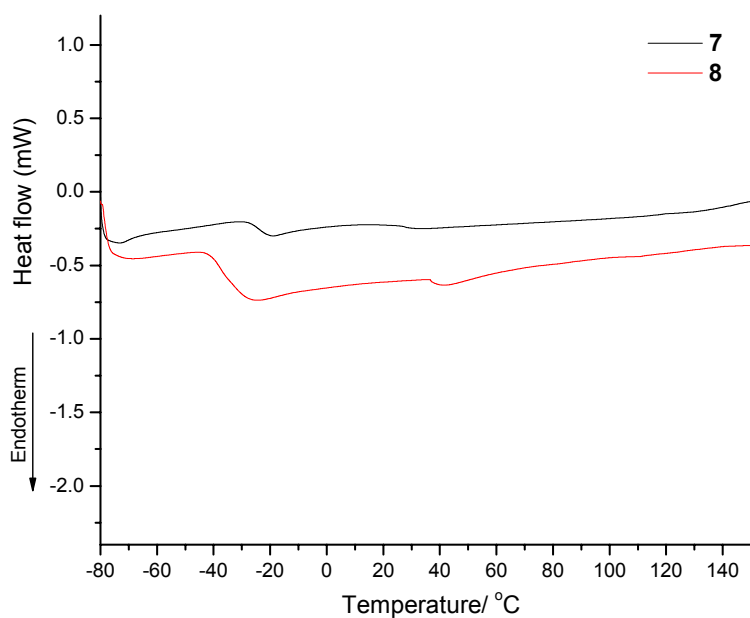

Supplement: b811506k.pdf [file b811506k.pdf]
